# Supplementary material for: In silico prediction of housekeeping long intergenic non-coding RNAs reveals HKlincR1 as an essential player in lung cancer cell survival
Source: PubMed Central journal article supplement (PMC6517443; doi:10.1038/s41598-019-43758-7), 2019-05-14
Supplement: 41598_2019_43758_MOESM1_ESM.pdf [file 41598_2019_43758_MOESM1_ESM.pdf]

***In silico* prediction of housekeeping long intergenic non-coding RNAs reveals *HKlincR1* as an essential player in lung cancer cell survival**

Danish Memon <sup>§,§</sup>, Jing Bi <sup>§</sup>, Crispin J Miller <sup>\*</sup>

RNA Biology Group, CRUK Manchester Institute, The University of Manchester, Alderley Park, Manchester SK10 4TG UK

\*corresponding author: [crispin.miller@cruk.manchester.ac.uk](mailto:crispin.miller@cruk.manchester.ac.uk)

<sup>§</sup>current address: European Bioinformatics Institute (EMBL-EBI) / Cancer Research UK Cambridge Institute, The University of Cambridge, UK.

<sup>§</sup>equal contribution

## **Supplementary Tables**

### **Supplementary Table S1**

List of HK-lincRNA and TS-lincRNA identified from the HBM RNA-Seq dataset.

### **Supplementary Table S2**

List of 'core essential' HK-lincRNAs.

### **Supplementary Table S3**

Differentially expressed protein-coding genes on knockdown of HKlincR1.
